# Supplementary material for: PF-127 hydrogel plus sodium ascorbyl phosphate improves Wharton’s jelly mesenchymal stem cell-mediated skin wound healing in mice
Source: PubMed Central journal article supplement (PMC7119174; doi:10.1186/s13287-020-01638-2), 2020-04-03

# Supplement Figure 1

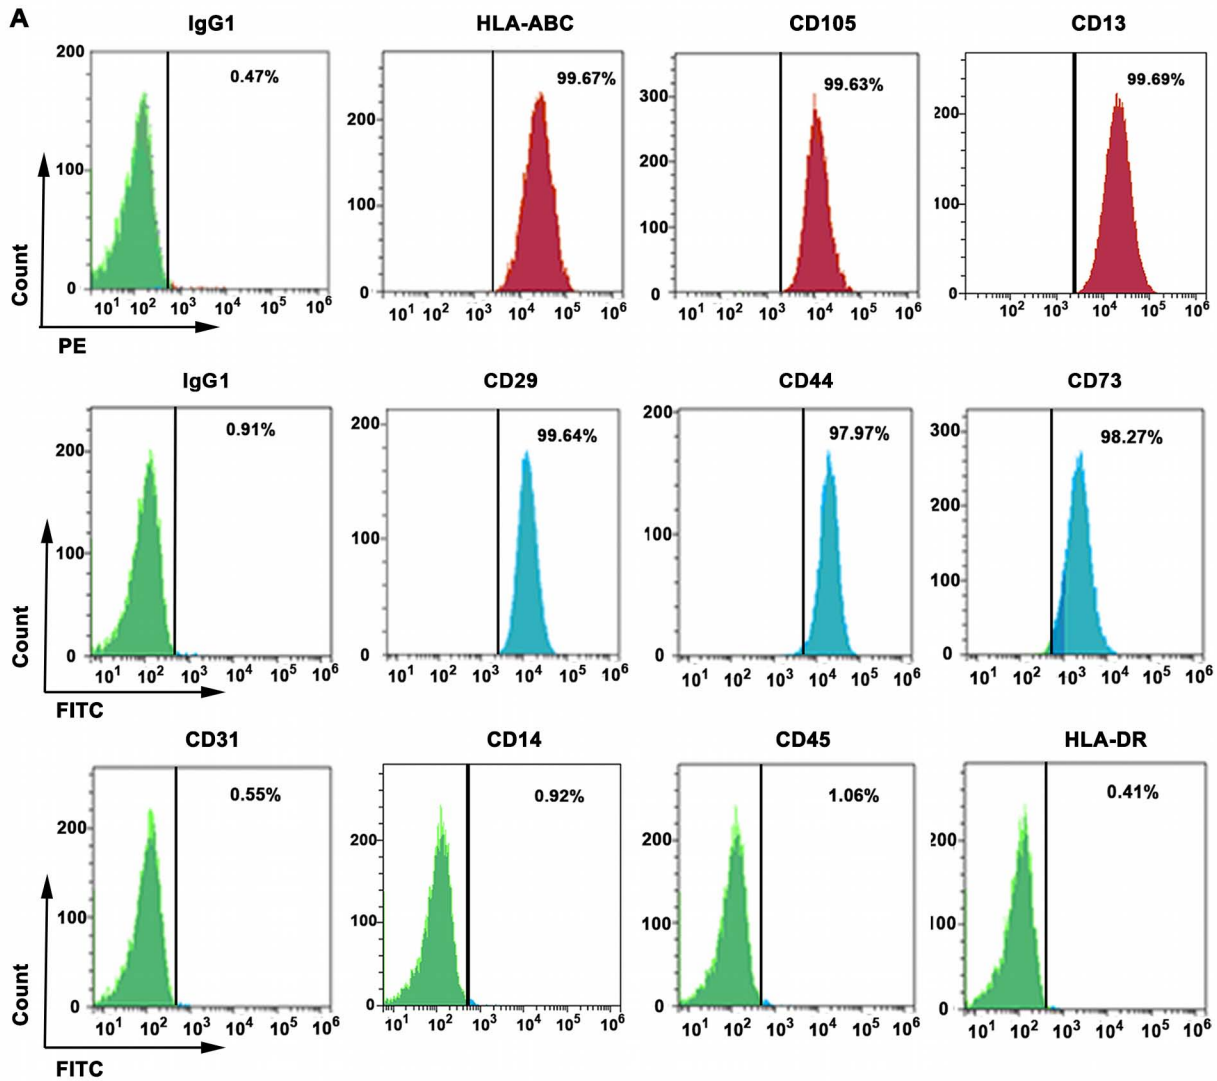

## Supplementary Figure 2

**A**

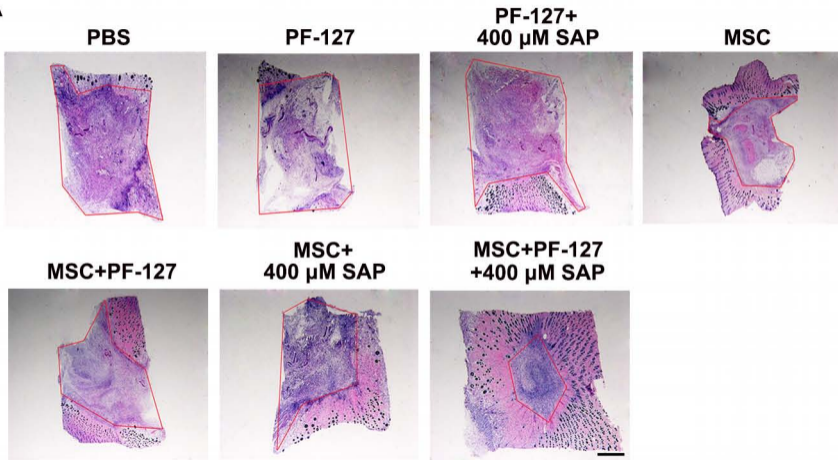

**B**

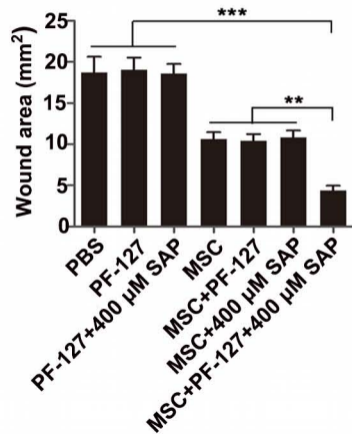

# Supplementary Figure 3

A

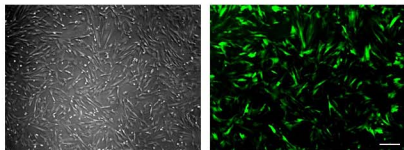

B

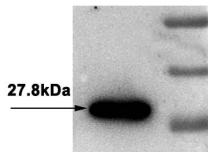

C

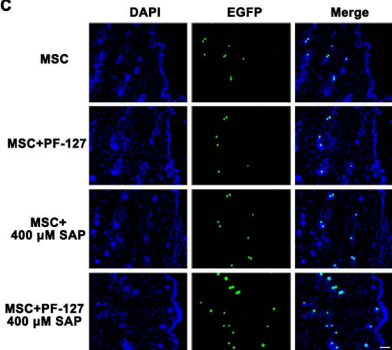

D

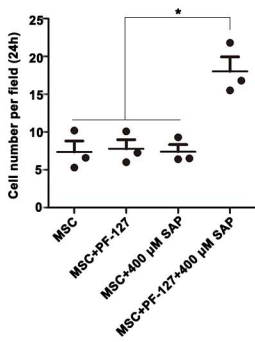

Supplement: 13287_2020_1638_MOESM1_ESM.pdf [file 13287_2020_1638_MOESM1_ESM.pdf]
